# Supplementary material
Source: PubMed Central journal article supplement (PMC4578250)
Supplement: NIHMS65135-supplement-Suppl_Table_1.pdf [file NIHMS65135-supplement-Suppl_Table_1.pdf]

Supplemental Table 1

|                  | 14 dpi           |                      |                    |                      | 30 dpi           |                  |                  |                  |
|------------------|------------------|----------------------|--------------------|----------------------|------------------|------------------|------------------|------------------|
|                  | ipsilateral      |                      | contralateral      |                      | ipsilateral      |                  | contralateral    |                  |
|                  | Vehicle          | VEGF                 | Vehicle            | VEGF                 | Vehicle          | VEGF             | Vehicle          | VEGF             |
| <b>CCL1</b>      | 0,34 [0,20-0,54] | 0,26 [0,12-0,44]     | 0,43 [0,33-0,71]   | 0,32 [0,23-0,39]     | 0,44 [0,22-0,63] | 0,38 [0,20-0,69] | 0,44 [0,27-0,64] | 0,45 [0,22-0,70] |
| <b>CCL2</b>      | 0,31 [0,21-0,53] | 0,14 [0,11-0,17] *   | 0,24 [0,18-0,31]   | 0,15 [0,14-0,16] *   | 0,33 [0,22-0,53] | 0,27 [0,16-0,37] | 0,30 [0,27-0,42] | 0,28 [0,21-0,35] |
| <b>CCL3</b>      | 0,23 [0,13-0,37] | 0,10 [0,05-0,17]     | 0,20 [0,13-0,37]   | 0,11 [0,07-0,16]     | 0,26 [0,15-0,44] | 0,23 [0,09-0,37] | 0,18 [0,12-0,28] | 0,19 [0,14-0,24] |
| <b>CCL4</b>      | 0,17 [0,10-0,29] | 0,05 [0,03-0,07]     | 0,15 [0,10-0,22]   | 0,06 [0,02-0,10] *   | 0,15 [0,09-0,24] | 0,13 [0,09-0,16] | 0,13 [0,08-0,20] | 0,14 [0,10-0,20] |
| <b>CCL5</b>      | 0,24 [0,13-0,37] | 0,12 [0,07-0,20]     | 0,19 [0,09-0,26]   | 0,12 [0,08-0,19]     | 0,23 [0,15-0,36] | 0,19 [0,11-0,26] | 0,19 [0,12-0,34] | 0,20 [0,14-0,26] |
| <b>CCL11</b>     | 0,07 [0,04-0,11] | 0,05 [0,02-0,08]     | 0,13 [0,08-0,23]   | 0,04 [0,01-0,08]     | 0,11 [0,06-0,14] | 0,13 [0,09-0,17] | 0,14 [0,09-0,18] | 0,12 [0,06-0,17] |
| <b>CCL12</b>     | 0,28 [0,15-0,43] | 0,09 [0,06-0,10] *   | 0,23 [0,12-0,43]   | 0,08 [0,08-0,11] *   | 0,24 [0,17-0,34] | 0,21 [0,12-0,33] | 0,22 [0,17-0,27] | 0,22 [0,09-0,32] |
| <b>CCL17</b>     | 0,10 [0,06-0,16] | 0,10 [0,03-0,14]     | 0,14 [0,08-0,22]   | 0,08 [0,05-0,16]     | 0,18 [0,07-0,30] | 0,14 [0,01-0,27] | 0,20 [0,13-0,30] | 0,18 [0,09-0,23] |
| <b>CXCL1</b>     | 0,24 [0,16-0,36] | 0,16 [0,12-0,25]     | 0,28 [0,19-0,34]   | 0,17 [0,10-0,24] *   | 0,31 [0,19-0,40] | 0,27 [0,13-0,41] | 0,32 [0,21-0,46] | 0,36 [0,26-0,48] |
| <b>CXCL2</b>     | 0,21 [0,13-0,31] | 0,07 [0,04-0,12] *   | 0,20 [0,10-0,27]   | 0,11 [0,05-0,17]     | 0,21 [0,12-0,33] | 0,20 [0,12-0,31] | 0,15 [0,09-0,31] | 0,17 [0,11-0,22] |
| <b>CXCL9</b>     | 0,33 [0,22-0,54] | 0,17 [0,11-0,28]     | 0,34 [0,24-0,55]   | 0,17 [0,13-0,19] *   | 0,38 [0,19-0,64] | 0,34 [0,20-0,52] | 0,31 [0,22-0,52] | 0,36 [0,25-0,54] |
| <b>CXCL10</b>    | 0,94 [0,36-1,55] | 0,52 [0,31-0,72]     | 0,37 [0,23-0,77]   | 0,22 [0,12-0,33]     | 0,61 [0,35-1,07] | 0,38 [0,20-0,58] | 0,33 [0,22-0,45] | 0,28 [0,22-0,36] |
| <b>CXCL11</b>    | 0,25 [0,15-0,38] | 0,16 [0,08-0,28]     | 0,23 [0,15-0,36]   | 0,16 [0,13-0,19] *   | 0,27 [0,13-0,41] | 0,21 [0,12-0,28] | 0,28 [0,14-0,42] | 0,24 [0,17-0,31] |
| <b>CXCL12</b>    | 0,11 [0,05-0,21] | 0,02 [0,01-0,03]     | 0,10 [0,08-0,13]   | 0,02 [0,01-0,05] *** | 0,12 [0,07-0,18] | 0,10 [0,03-0,19] | 0,08 [0,05-0,10] | 0,11 [0,02-0,14] |
| <b>CXCL13</b>    | 0,15 [0,11-0,21] | 0,08 [0,02-0,15]     | 0,12 [0,04-0,24]   | 0,05 [0,04-0,06]     | 0,22 [0,10-0,42] | 0,16 [0,12-0,21] | 0,15 [0,05-0,27] | 0,16 [0,12-0,21] |
| <b>M-CSF</b>     | 0,35 [0,25-0,57] | 0,16 [0,11-0,22] *   | 0,30 [0,17-0,42]   | 0,16 [0,11-0,22] *   | 0,37 [0,25-0,55] | 0,32 [0,15-0,47] | 0,26 [0,17-0,36] | 0,35 [0,24-0,47] |
| <b>G-CSF</b>     | 0,22 [0,15-0,31] | 0,13 [0,09-0,21]     | 0,25 [0,16-0,44]   | 0,14 [0,11-0,18]     | 0,27 [0,16-0,39] | 0,22 [0,15-0,36] | 0,27 [0,15-0,39] | 0,28 [0,23-0,34] |
| <b>GM-CSF</b>    | 0,17 [0,12-0,21] | 0,08 [0,05-0,10] *** | 0,21 [0,16-0,37]   | 0,09 [0,04-0,14] *   | 0,23 [0,10-0,31] | 0,22 [0,14-0,39] | 0,25 [0,14-0,33] | 0,25 [0,13-0,34] |
| <b>TNFalpha</b>  | 0,20 [0,11-0,28] | 0,18 [0,14-0,31]     | 0,21 [0,13-0,26]   | 0,19 [0,07-0,25]     | 0,28 [0,10-0,53] | 0,28 [0,13-0,43] | 0,26 [0,12-0,49] | 0,28 [0,21-0,34] |
| <b>IFNgamma</b>  | 0,62 [0,40-0,79] | 0,54 [0,24-0,69]     | 0,71 [0,46-0,95]   | 0,58 [0,34-0,74]     | 0,65 [0,37-1,02] | 0,66 [0,39-0,87] | 0,71 [0,49-1,02] | 0,70 [0,56-0,80] |
| <b>IL-1alpha</b> | 0,39 [0,24-0,66] | 0,19 [0,13-0,35]     | 0,35 [0,25-0,62]   | 0,18 [0,16-0,23]     | 0,42 [0,25-0,62] | 0,42 [0,23-0,66] | 0,34 [0,23-0,48] | 0,40 [0,24-0,53] |
| <b>IL-1beta</b>  | 0,27 [0,14-0,43] | 0,14 [0,07-0,27]     | 0,25 [0,17-0,36]   | 0,13 [0,10-0,16] *   | 0,28 [0,18-0,45] | 0,27 [0,13-0,47] | 0,26 [0,18-0,38] | 0,26 [0,17-0,35] |
| <b>IL-1ra</b>    | 0,41 [0,19-0,63] | 0,19 [0,10-0,30]     | 0,31 [0,12-0,68]   | 0,15 [0,14-0,23]     | 0,37 [0,18-0,47] | 0,28 [0,11-0,47] | 0,22 [0,15-0,38] | 0,24 [0,16-0,36] |
| <b>IL-2</b>      | 0,45 [0,22-0,73] | 0,40 [0,14-0,63]     | 0,42 [0,21-0,62]   | 0,44 [0,30-0,58]     | 0,55 [0,34-0,82] | 0,46 [0,39-0,52] | 0,55 [0,37-0,72] | 0,55 [0,32-0,77] |
| <b>IL-3</b>      | 0,20 [0,13-0,29] | 0,14 [0,06-0,24]     | 0,24 [0,19-0,34]   | 0,14 [0,12-0,21] *   | 0,25 [0,15-0,36] | 0,23 [0,19-0,27] | 0,25 [0,15-0,36] | 0,23 [0,19-0,27] |
| <b>IL-4</b>      | 0,32 [0,20-0,50] | 0,23 [0,11-0,41]     | 0,34 [0,27-0,48]   | 0,20 [0,15-0,26] *   | 0,36 [0,20-0,54] | 0,30 [0,20-0,38] | 0,36 [0,20-0,54] | 0,43 [0,23-0,70] |
| <b>IL-6</b>      | 0,08 [0,04-0,12] | 0,03 [0,01-0,05] *   | 0,09 [0,05-0,15]   | 0,03 [0,00-0,05] *   | 0,06 [0,03-0,12] | 0,08 [0,06-0,11] | 0,06 [0,02-0,10] | 0,09 [0,05-0,13] |
| <b>IL-7</b>      | 0,30 [0,21-0,46] | 0,18 [0,10-0,30]     | 0,35 [0,26-0,56]   | 0,21 [0,17-0,26]     | 0,32 [0,22-0,51] | 0,31 [0,18-0,46] | 0,36 [0,21-0,48] | 0,38 [0,24-0,51] |
| <b>IL-10</b>     | 0,29 [0,12-0,55] | 0,10 [0,05-0,12]     | 0,33 [0,23-0,57]   | 0,14 [0,08-0,19] *   | 0,24 [0,06-0,36] | 0,22 [0,16-0,26] | 0,33 [0,19-0,42] | 0,31 [0,13-0,40] |
| <b>IL_13</b>     | 0,26 [0,15-0,44] | 0,16 [0,10-0,28]     | 0,30 [0,22-0,44]   | 0,15 [0,14-0,17] *   | 0,27 [0,14-0,42] | 0,29 [0,18-0,43] | 0,28 [0,23-0,39] | 0,28 [0,21-0,36] |
| <b>IL-12p70</b>  | 0,09 [0,04-0,15] | 0,03 [0,01-0,04]     | 0,08 [0,02-0,15] * | 0,03 [0,02-0,05]     | 0,08 [0,04-0,13] | 0,07 [0,05-0,08] | 0,07 [0,04-0,11] | 0,09 [0,05-0,15] |
| <b>IL-16</b>     | 0,60 [0,40-1,05] | 0,35 [0,21-0,59]     | 0,47 [0,31-0,67]   | 0,36 [0,21-0,46]     | 0,53 [0,30-0,83] | 0,49 [0,26-0,79] | 0,42 [0,32-0,55] | 0,47 [0,30-0,67] |
| <b>IL-17</b>     | 0,30 [0,14-0,43] | 0,20 [0,07-0,40]     | 0,38 [0,19-0,52]   | 0,20 [0,09-0,29]     | 0,36 [0,24-0,52] | 0,32 [0,16-0,52] | 0,31 [0,24-0,46] | 0,30 [0,17-0,45] |
| <b>IL-23</b>     | 0,39 [0,22-0,59] | 0,28 [0,13-0,43]     | 0,37 [0,19-0,51]   | 0,28 [0,16-0,36]     | 0,36 [0,23-0,52] | 0,38 [0,26-0,61] | 0,35 [0,25-0,48] | 0,42 [0,29-0,58] |
| <b>IL-27</b>     | 0,36 [0,19-0,52] | 0,23 [0,09-0,41]     | 0,32 [0,17-0,41]   | 0,22 [0,13-0,30]     | 0,32 [0,17-0,49] | 0,37 [0,19-0,45] | 0,36 [0,28-0,50] | 0,35 [0,25-0,44] |
