# Supplementary material
Source: PubMed Central journal article supplement (PMC4578250)
Supplement: NIHMS65135-supplement-Suppl_Table_2.pdf [file NIHMS65135-supplement-Suppl_Table_2.pdf]

Supplemental Table 2

|          | ipsilateral      |                    |                      |                        |                     |                      |                      |
|----------|------------------|--------------------|----------------------|------------------------|---------------------|----------------------|----------------------|
|          | Vehicle          |                    |                      | VEGF                   |                     |                      |                      |
|          | striatum         | motor cortex       | parietal cortex      | striatum               | motor cortex        | parietal cortex      |                      |
| 14 dpi   | iNOS             | 2,33 [1,32-3,31]   | 12,44 [1,17-26,52]   | 13,15 [1,32-5,31]      | 2,84 [1,30-6,65]    | 2,04 [1,09-4,20]     | 4,99 [1,28-15,33]    |
|          | TNFalpha         | 18,63 [3,23-35,2]  | 40,9 [4,12-77,95]    | 69,62 [22,06-116,97]   | 20,35 [4,66-57,08]  | 11,62 [4,84-24,91]   | 35,09 [16,24-78,56]  |
|          | IL-1beta         | 37,58 [4,21-6,87]  | 257,66 [6,54-532,05] | 787,8 [31,89-15553,02] | 41,92 [6,45-120,29] | 47,72 [7,75-121,23]  | 108,22 [1,38-336,06] |
|          | IL-6             | 3,84 [1,78-5,68]   | 11,29 [2,38-21,72]   | 15,46 [3,66-27,48]     | 4,43 [1,27-9,48]    | 2,92 [2,24-4,11]     | 4,43 [3,53-5,36]     |
|          | TGFbeta          | 3,97 [2,20-6,67]   | 4,17 [2,44-6,72]     | 7,89 [5,82-10,46]      | 4,09 [2,64-7,25]    | 2,62 [1,42-3,70]     | 5,98 [2,35-8,66]     |
|          | CXCR4            | 6,25 [1,71-12,59]  | 11,43 [1,34-27,4]    | 11,7 [2,36-20,61]      | 3,67 [1,70-6,19]    | 1,80 [0,86-2,41]     | 6,42 [2,77-7,99]     |
|          | VCAM-1           | 1,55 [1,18-2,05]   | 1,22 [0,99-1,57]     | 1,69 [1,20-2,17]       | 1,56 [1,05-2,74]    | 0,90 [0,69-1,07]     | 1,61 [0,88-2,52]     |
|          |                  | contralateral      |                      |                        |                     |                      |                      |
|          |                  | Vehicle            |                      |                        | VEGF                |                      |                      |
|          |                  | striatum           | motor cortex         | parietal cortex        | striatum            | motor cortex         | parietal cortex      |
|          | iNOS             | 2,13 [1,35-2,78]   | 1,51 [1,22-1,67]     | 2,51 [1,33-4,79]       | 1,87 [1,16-3,14]    | 1,63 [1,40-1,89]     | 1,77 [1,00-3,17]     |
|          | TNFalpha         | 6,19 [1,23-11,76]  | 2,91 [0,76-4,88]     | 5,53 [0,76-15,08]      | 5,37 [0,92-15,16]   | 4,16 [1,47-8,64]     | 3,19 [0,86-9,50]     |
|          | IL-1beta         | 14,07 [1,91-26,65] | 7,54 [1,78-15,30]    | 13,37 [1,09-37,98]     | 15,43 [1,86-43,52]  | 14,04 [2,58-29,06]   | 8,97 [1,00-28,18]    |
|          | IL-6             | 2,45 [1,77-3,17]   | 1,94 [1,41-2,71]     | 3,32 [1,39-7,06]       | 1,77 [0,85-2,86]    | 2,01 [1,56-3,04]     | 1,86 [1,00-3,22]     |
| TGFbeta  | 1,64 [1,25-2,02] | 1,49 [1,21-1,81]   | 2,20 [1,49-4,12]     | 1,41 [1,24-1,84]       | 1,71 [1,53-1,97]    | 1,55 [1,00-2,48]     |                      |
| CXCR4    | 4,03 [1,25-8,14] | 2,03 [0,81-2,78]   | 4,59 [1,78-11,54]    | 3,42 [1,01-7,92]       | 1,66 [0,64-2,99]    | 1,33 [1,00-1,49]     |                      |
| VCAM-1   | 1,19 [0,95-1,40] | 0,85 [0,74-1,06]   | 1,26 [0,83-2,35]     | 1,01 [0,85-1,32]       | 0,81 [0,70-0,96]    | 0,89 [0,65-1,08]     |                      |
| 30 dpi   | ipsilateral      |                    |                      |                        |                     |                      |                      |
|          | Vehicle          |                    |                      | VEGF                   |                     |                      |                      |
|          | striatum         | motor cortex       | parietal cortex      | striatum               | motor cortex        | parietal cortex      |                      |
|          | iNOS             | 1,47 [1,32-1,83]   | 1,24 [1,09-1,49]     | 1,59 [1,32-1,89]       | 1,07 [0,70-1,30]    | 1,01 [0,57-1,40]     | 1,32 [0,96-1,94]     |
|          | TNFalpha         | 7,54 [3,83-9,57]   | 7,17 [1,72-14,12]    | 7,94 [4,62-11,63]      | 4,91 [1,55-8,80]    | 10,4 [1,24-22,47]    | 14,83 [0,85-31,72]   |
|          | IL-1beta         | 11,89 [8,88-18,83] | 19,96 [2,18-42,60]   | 23,36 [6,47-43,94]     | 9,47 [4,30-16,52]   | 10,32 [2,67-18,73]   | 45,96 [1,41-98,90]   |
|          | IL-6             | 2,11 [1,34-3,06]   | 2,00 [1,36-2,80]     | 2,44 [1,54-3,81]       | 2,47 [1,65-2,92]    | 2,29 [1,59-3,59]     | 2,84 [1,15-4,20]     |
|          | TGFbeta          | 3,33 [1,95-4,31]   | 2,60 [1,73-3,68]     | 3,27 [2,21-3,92]       | 2,71 [1,54-3,84]    | 2,59 [1,58-3,91]     | 3,97 [1,83-6,90]     |
|          | CXCR4            | 6,36 [2,65-12,85]  | 2,57 [0,92-3,90]     | 4,61 [2,77-7,52]       | 2,76 [1,03-3,51]    | 2,28 [1,26-3,09]     | 5,76 [1,50-10,05]    |
|          | VCAM-1           | 1,23 [1,13-1,46]   | 0,88 [0,64-1,13]     | 1,09 [0,83-1,34]       | 1,51 [1,29-1,77]    | 1,19 [1,11-1,29]     | 1,34 [0,85-1,77]     |
|          |                  | contralateral      |                      |                        |                     |                      |                      |
|          |                  | Vehicle            |                      |                        | VEGF                |                      |                      |
|          |                  | striatum           | motor cortex         | parietal cortex        | striatum            | motor cortex         | parietal cortex      |
|          | iNOS             | 1,40 [0,91-1,78]   | 1,51 [1,39-1,71]     | 1,48 [1,38-1,56]       | 1,22 [0,92-1,75]    | 0,83 [0,71-0,94] *** | 1,08 [0,84-1,35] *   |
| TNFalpha | 2,25 [1,43-2,87] | 2,04 [1,34-3,10]   | 1,68 [0,83-2,68]     | 1,29 [0,68-1,81] *     | 1,81 [0,99-3,04]    | 1,10 [0,07-1,92]     |                      |
| IL-1beta | 3,01 [0,62-5,44] | 4,37 [1,18-9,26]   | 3,40 [1,20-5,93]     | 2,17 [0,95-3,42]       | 3,26 [0,92-8,26]    | 1,37 [0,09-2,48]     |                      |
| IL-6     | 1,62 [0,88-2,39] | 2,00 [1,34-2,93]   | 1,98 [1,05-2,75]     | 1,81 [1,35-2,58]       | 1,94 [1,40-2,41]    | 2,18 [1,46-2,84]     |                      |
| TGFbeta  | 1,62 [1,56-1,67] | 1,81 [1,67-1,95]   | 1,51 [1,16-1,84]     | 1,28 [1,02-1,63] *     | 1,64 [0,99-2,31]    | 1,43 [1,36-1,51]     |                      |
| CXCR4    | 3,74 [1,67-5,94] | 1,98 [0,95-4,04]   | 1,90 [0,56-3,13]     | 2,43 [0,63-4,74]       | 1,74 [1,15-2,94]    | 1,21 [0,66-1,67]     |                      |
| VCAM-1   | 0,98 [0,92-1,06] | 0,86 [0,81-0,90]   | 0,82 [0,75-0,96]     | 1,08 [0,86-1,35] *     | 1,03 [0,70-1,42]    | 1,02 [0,95-1,09] *   |                      |
