# Supplementary material
Source: PubMed Central journal article supplement (PMC4578250)

# Supplemental Figure S1

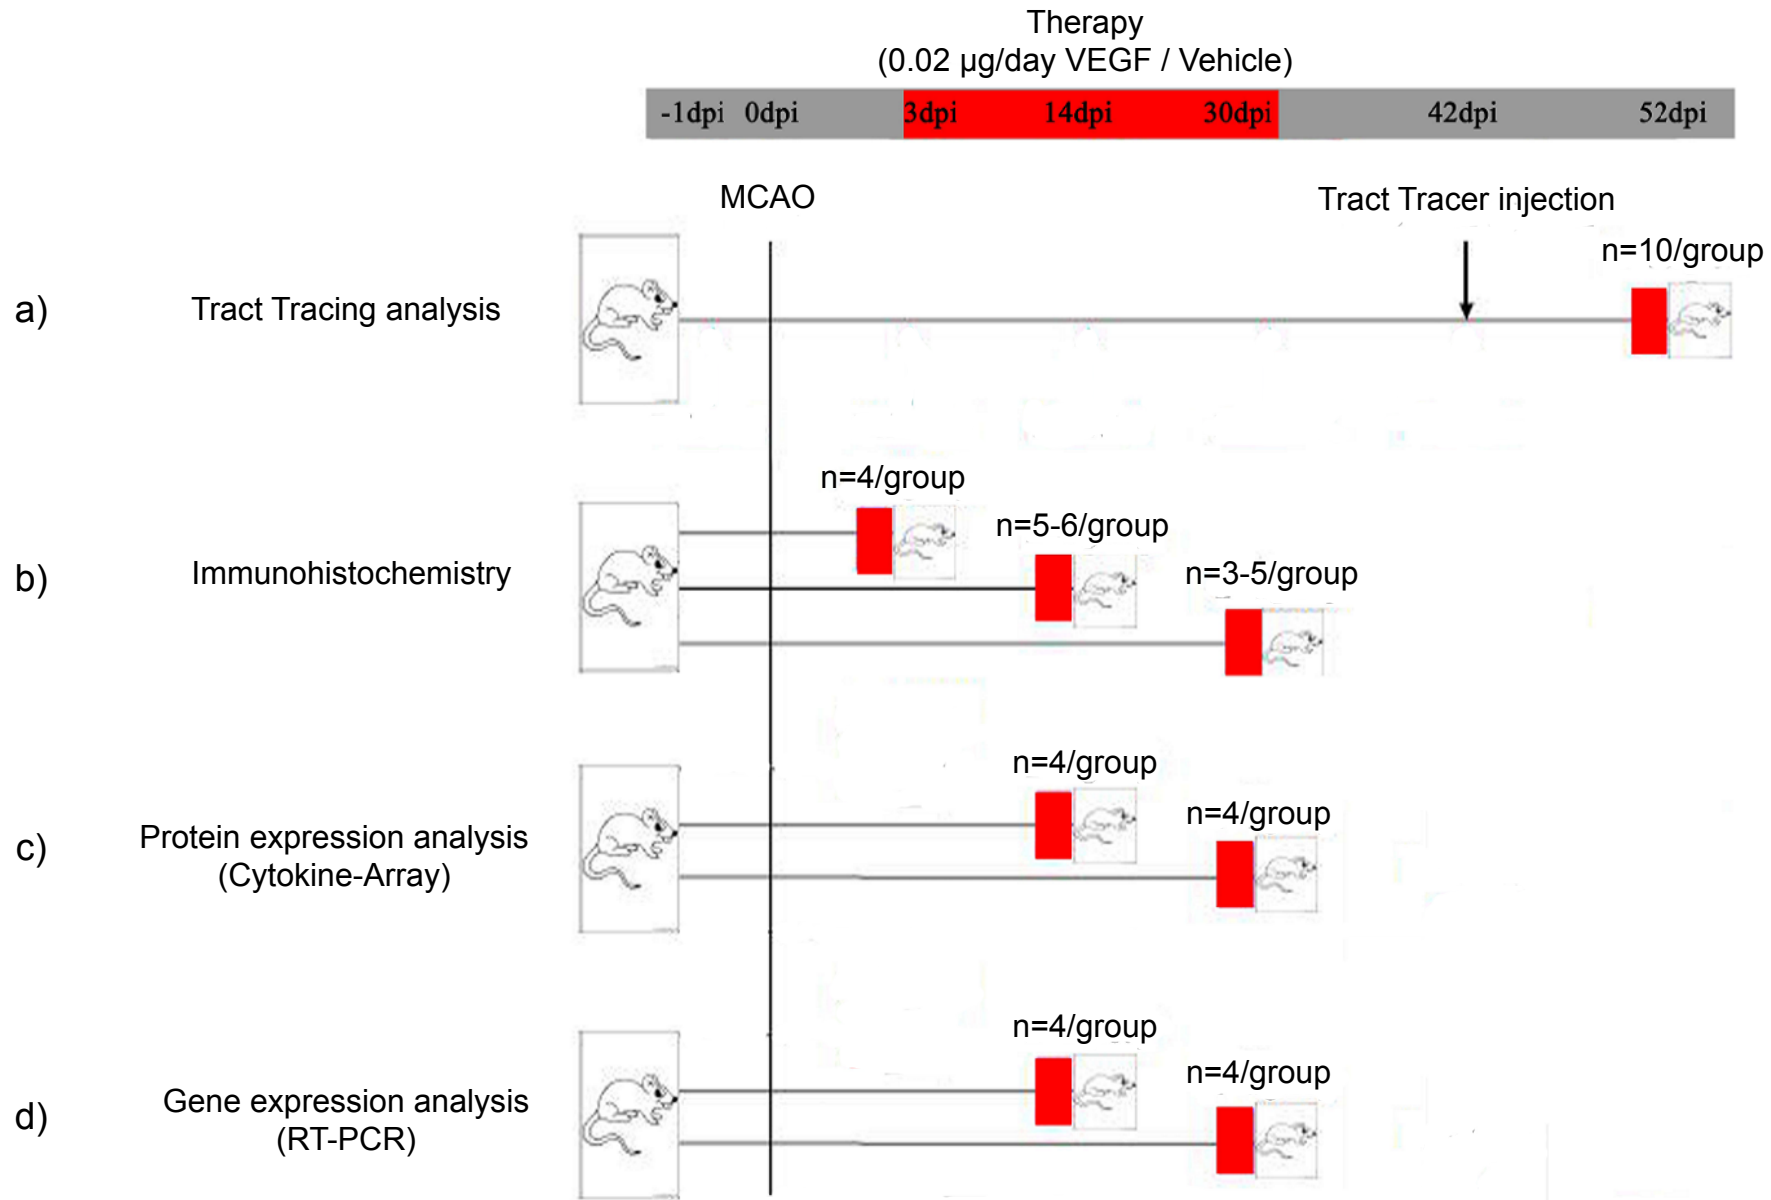

Supplement: NIHMS65135-supplement-Suppl_Figure_1.pdf [file NIHMS65135-supplement-Suppl_Figure_1.pdf]
